# Supplementary material for: In-Line Aerosol Therapy via Nasal Cannula during Adult and Paediatric Normal, Obstructive, and Restrictive Breathing
Source: MDPI journal article supplement (doi:10.3390/pharmaceutics15122679), 2023-11-27
Supplement: s1 [file s1]

### Supplementary Materials

**Table S1.** The effects of supplemental gas flow rate (LPM) and lung health on the tracheal dose (%) available in spontaneously breathing adult receiving in-line aerosol therapy with HFNO. P-values < 0.05 considered significant.

| Flow Rate (LPM)             | Lung Health | Tracheal dose (%) (mean ± SD) | P - value |
|-----------------------------|-------------|-------------------------------|-----------|
| <b>6</b><br>(Low flow mode) | Healthy     | 16.58 ± 0.36                  | 0.000     |
|                             | Restrictive | 15.12 ± 0.54                  |           |
|                             | Obstructive | 7.70 ± 0.51                   |           |
| <b>10</b>                   | Healthy     | 15.99 ± 0.71                  | 0.000     |
|                             | Restrictive | 15.63 ± 0.30                  |           |
|                             | Obstructive | 8.42 ± 0.70                   |           |
| <b>30</b>                   | Healthy     | 0.73 ± 0.13                   | 0.012     |
|                             | Restrictive | 1.20 ± 0.23                   |           |
|                             | Obstructive | 0.90 ± 0.25                   |           |
| <b>50</b>                   | Healthy     | 0.38 ± 0.09                   | 0.005     |
|                             | Restrictive | 0.23 ± 0.06                   |           |
|                             | Obstructive | 0.50 ± 0.15                   |           |

**Table S2.** The effects of supplemental gas flow rate (LPM) and lung health on the tracheal dose (%) available in spontaneously breathing paediatric model receiving in-line aerosol therapy with HFNO. P-values < 0.05 considered significant.

| Flow Rate (LPM) | Lung Health | Tracheal dose (%) (mean ± SD) | P - value |
|-----------------|-------------|-------------------------------|-----------|
| <b>3</b>        | Healthy     | 2.93 ± 0.20                   | 0.000     |
|                 | Restrictive | 0.91 ± 0.20                   |           |
|                 | Obstructive | 4.07 ± 0.45                   |           |
| <b>7</b>        | Healthy     | 0.71 ± 0.15                   | 0.030     |
|                 | Restrictive | 0.52 ± 0.26                   |           |
|                 | Obstructive | 0.88 ± 0.12                   |           |
